# Supplementary material for: Blood-based Genomic and Cellular Determinants of Response to Neoadjuvant PD-1 Blockade in Patients with Non-Small-Cell Lung Cancer
Source: bioRxiv or medRxiv preprint supplement (doi:10.1101/2021.12.07.21267340), 2023-02-13
Supplement: Supplementary file [file media-1.pdf]

## Supplementary document

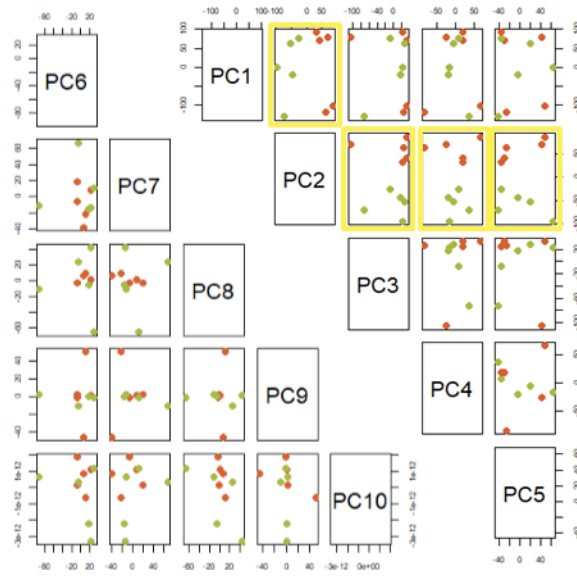

**Figure S1.** Principal component analysis (PCA) biplots of RNA-seq samples from color-coded groups (related to **Figure 2**). Yellow boxes indicate combination of principal components that can distinguish two groups.

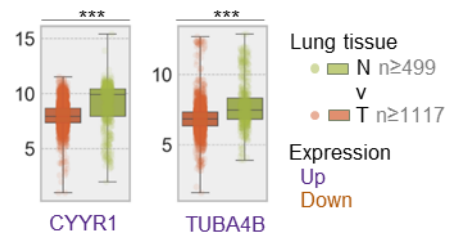

**Figure S2.** Relative mRNA levels of 2 genes as reported in normal lung and lung cancer tissues (related to **Figure 2**).

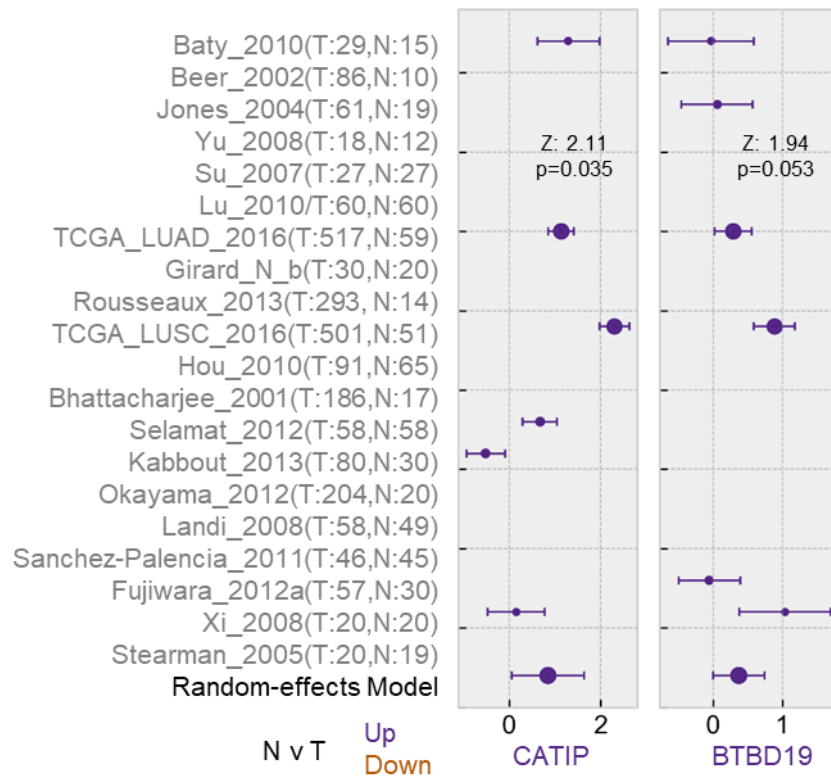

**Figure S3.** Differential gene expression meta-analysis on annotated genes (related to **Figure 3**).

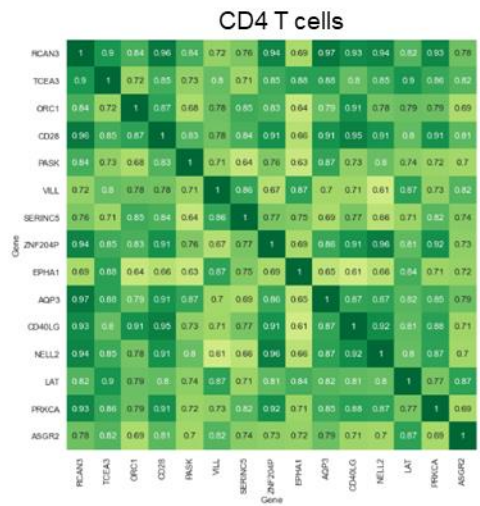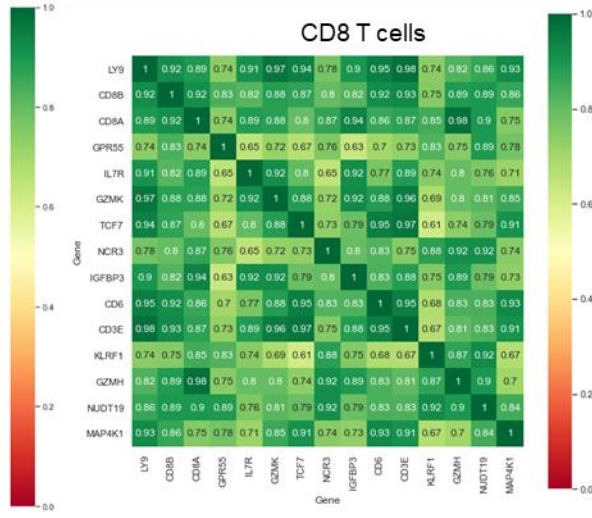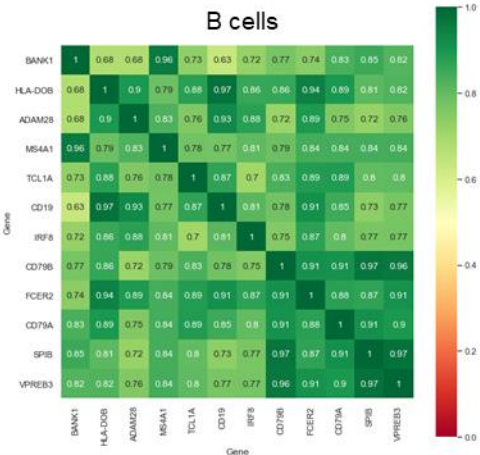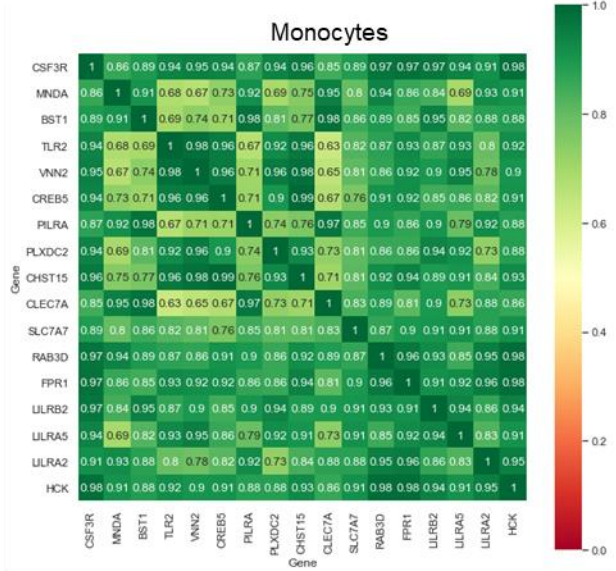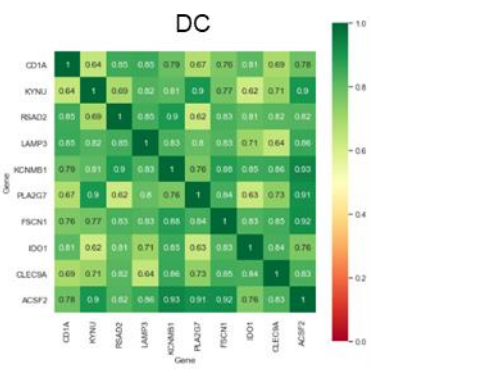

**Figure S4.** Pairwise similarity of filtered marker genes in 7 cell subsets as finalized in the updated AImmune approach. Pairwise similarity was computed based on gene expression across all subjects. DCs, dendritic cells.

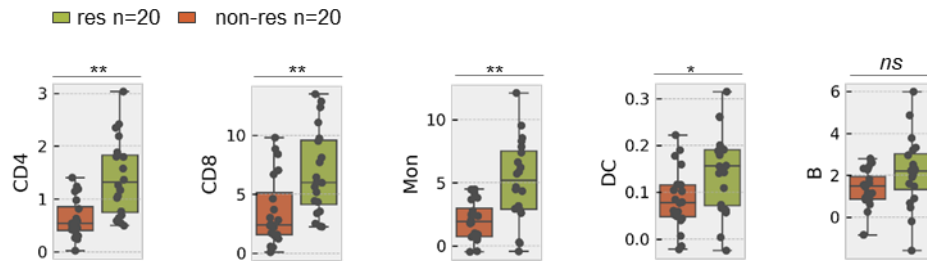

**Figure S5.** Immune cell scores of 5 cell subsets produced by Monte Carlo simulation (n=20 v 20), utilizing original leukocyte scores produced by from res and non-res subjects.

**Supplemental Table S1** DEG lists identified from this study

**Table S1a** List of DEGs identified by comparison of post- versus pre- treatment

**Table S1b** List of DEGs identified by comparison of responders versus non-responders

**Supplemental Table S2** Summary of validation results

**Table S2a** Validation summary of top 10 DEGs identified by comparison of post- versus pre- treatment

**Table S2b** Validation summary of top 10 DEGs identified by comparison of responders versus non-responders

**Supplemental Table S3** List of PCR primers used in this study
